# Supplementary material for: Identification of Exoenzymes Secreted by Entomopathogenic Fungus Beauveria pseudobassiana RGM 2184 and Their Effect on the Degradation of Cocoons and Pupae of Quarantine Pest Lobesia botrana
Source: MDPI journal article supplement (doi:10.3390/jof8101083), 2022-10-14
Supplement: s1 [file s1]

**Table S3.** Average percentage of each amino acid for cold-adapted, mesophilic and thermophilic enzymes. Last three columns indicate the q value of the two-stage linear step-up procedure of Benjamini, Krieger, and Yekutieli.

| aa  | Cold adapted (%) |       |          | Mesophilic (%) |       |          | Thermophilic (%) |       |          | Cold-adapted vs<br>Mesophilic | Cold-adapted vs<br>Thermophilic | Mesophilic vs<br>Thermophilic |
|-----|------------------|-------|----------|----------------|-------|----------|------------------|-------|----------|-------------------------------|---------------------------------|-------------------------------|
|     | $\bar{x}$        | $\pm$ | $\sigma$ | $\bar{x}$      | $\pm$ | $\sigma$ | $\bar{x}$        | $\pm$ | $\sigma$ | q value                       | q value                         | q value                       |
| Ala | 10.28            | $\pm$ | 2.7      | 9.01           | $\pm$ | 2.5      | 9.72             | $\pm$ | 2.1      | 0.54024                       | 0.405918                        | 0.866327                      |
| Cys | 1.12             | $\pm$ | 0.6      | 1.05           | $\pm$ | 1.0      | 1.01             | $\pm$ | 0.6      | 0.89454                       | 0.663848                        | 0.902428                      |
| Asp | 6.04             | $\pm$ | 1.6      | 6.28           | $\pm$ | 1.3      | 5.97             | $\pm$ | 1.3      | 0.856991                      | 0.75692                         | 0.741512                      |
| Glu | 2.98             | $\pm$ | 1.4      | 3.33           | $\pm$ | 1.5      | 5.29             | $\pm$ | 2.1      | 0.856991                      | <b>0.005671</b>                 | 0.033267                      |
| Phe | 3.39             | $\pm$ | 0.9      | 3.45           | $\pm$ | 0.8      | 3.67             | $\pm$ | 0.9      | 0.89454                       | 0.438019                        | 0.701969                      |
| Gly | 10.93            | $\pm$ | 1.9      | 8.84           | $\pm$ | 1.8      | 8.85             | $\pm$ | 1.1      | <b>0.007839</b>               | <b>0.003756</b>                 | 0.902428                      |
| His | 1.67             | $\pm$ | 0.8      | 1.88           | $\pm$ | 0.9      | 2.04             | $\pm$ | 1.0      | 0.856991                      | 0.431052                        | 0.902428                      |
| Ile | 5.01             | $\pm$ | 1.1      | 5.55           | $\pm$ | 1.5      | 4.50             | $\pm$ | 1.6      | 0.692372                      | 0.681556                        | 0.522053                      |
| Lys | 3.75             | $\pm$ | 1.7      | 5.79           | $\pm$ | 2.9      | 4.14             | $\pm$ | 1.7      | 0.133615                      | 0.438019                        | 0.500879                      |
| Leu | 7.55             | $\pm$ | 2.3      | 7.81           | $\pm$ | 1.8      | 8.59             | $\pm$ | 1.7      | 0.856991                      | 0.319242                        | 0.547268                      |
| Met | 1.81             | $\pm$ | 0.7      | 1.79           | $\pm$ | 0.7      | 1.76             | $\pm$ | 0.9      | 0.932639                      | 0.731372                        | 0.902428                      |
| Asn | 5.49             | $\pm$ | 1.5      | 6.04           | $\pm$ | 2.1      | 4.89             | $\pm$ | 1.8      | 0.856991                      | 0.552061                        | 0.522053                      |
| Pro | 4.56             | $\pm$ | 1.9      | 4.84           | $\pm$ | 2.3      | 6.17             | $\pm$ | 1.5      | 0.856991                      | 0.070423                        | 0.522053                      |
| Gln | 3.28             | $\pm$ | 1.1      | 3.10           | $\pm$ | 1.1      | 2.94             | $\pm$ | 0.9      | 0.856991                      | 0.317612                        | 0.688192                      |
| Arg | 3.24             | $\pm$ | 1.3      | 3.47           | $\pm$ | 1.9      | 4.34             | $\pm$ | 1.7      | 0.856991                      | 0.149236                        | 0.522053                      |
| Ser | 8.69             | $\pm$ | 2.2      | 8.67           | $\pm$ | 2.2      | 6.04             | $\pm$ | 1.4      | 0.934224                      | <b>0.003756</b>                 | <b>0.008768</b>               |
| Thr | 7.50             | $\pm$ | 1.8      | 6.26           | $\pm$ | 2.4      | 5.96             | $\pm$ | 1.5      | 0.395353                      | 0.052582                        | 0.902428                      |
| Val | 7.72             | $\pm$ | 1.3      | 6.58           | $\pm$ | 1.6      | 7.10             | $\pm$ | 1.4      | 0.138528                      | 0.232439                        | 0.741512                      |
| Trp | 1.42             | $\pm$ | 0.9      | 1.63           | $\pm$ | 1.0      | 2.02             | $\pm$ | 1.0      | 0.856991                      | 0.13347                         | 0.522053                      |
| Tyr | 3.57             | $\pm$ | 0.7      | 4.64           | $\pm$ | 1.2      | 5.01             | $\pm$ | 1.1      | 0.039502                      | <b>0.001852</b>                 | 0.522053                      |

$\bar{x}$ : mean;  $\sigma$ : standard deviation. **In bold** q value < 0.01.
