# Supplementary material for: Identification of Exoenzymes Secreted by Entomopathogenic Fungus Beauveria pseudobassiana RGM 2184 and Their Effect on the Degradation of Cocoons and Pupae of Quarantine Pest Lobesia botrana
Source: MDPI journal article supplement (doi:10.3390/jof8101083), 2022-10-14
Supplement: s1 [file s1]

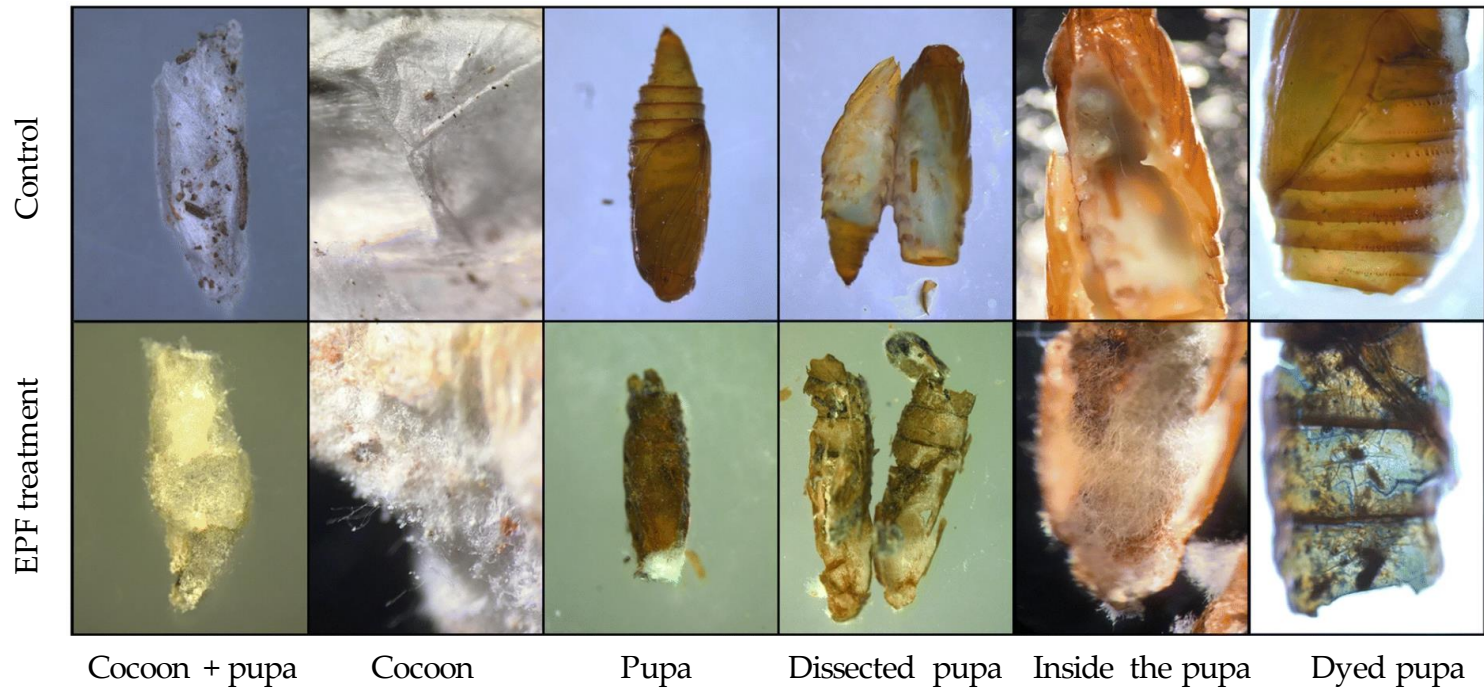

**Figure S1.** Representative images of EPF *Beauveria pseudobassiana* colonization on pupae and cocoon of *Lobesia botrana*. In the first row, images of a pupa subjected to the control treatment are shown. The lower row shows images of a pupa infected through *B. pseudobassiana* formulation treatment in the urban sector. The hyphae that penetrated the cutide of the pupa are stained with lactophenol blue. Figure obtained from Altimira et al. [87].
