# Supplementary material for: Identification of Exoenzymes Secreted by Entomopathogenic Fungus Beauveria pseudobassiana RGM 2184 and Their Effect on the Degradation of Cocoons and Pupae of Quarantine Pest Lobesia botrana
Source: MDPI journal article supplement (doi:10.3390/jof8101083), 2022-10-14
Supplement: s1 [file s1]

**Table S1.** List of entomopathogenic fungal genomes used for LS-BSR analysis.

| Strain                                             | GenBank assembly accession |
|----------------------------------------------------|----------------------------|
| <i>Purpureocillium lilacinum</i> PLFJ-1            | GCA_001653265.1            |
| <i>Cordyceps javanica</i> IJ1G                     | GCA_006981985.1            |
| <i>Sporothrix insectorum</i> RCEF264               | GCA_001636815.1            |
| <i>Moelleriella libera</i> RCEF2490                | GCA_001636675.1            |
| <i>Metarhizium robertsii</i> ARSEF2575             | GCA_000591435.1            |
| <i>Lecanicillium psalliotae</i> HWLR35             | GCA_002796755.1            |
| <i>Akanthomyces lecanii</i> UM487                  | GCA_001653215.1            |
| <i>Metarhizium acridum</i> CQMa102                 | GCA_000187405.1            |
| <i>Cordyceps fumosorosea</i> ARSEF2679             | GCA_001636725.1            |
| <i>Metarhizium robertsii</i> ARSEF23               | GCA_000187425.2            |
| <i>Beauveria bassiana</i> ARSEF1520                | GCA_001684195.1            |
| <i>Beauveria brongniartii</i> RCEF3172             | GCA_001636735.1            |
| <i>Tolypocladium paradoxum</i> NRBC100945          | GCA_002916505.1            |
| <i>Aspergillus flavus</i> NRRL3357                 | GCA_014117465.1            |
| <i>Beauveria bassiana</i> ARSEF2860                | GCA_000280675.1            |
| <i>Aspergillus flavus</i> NRRL118543               | GCA_014117465.1            |
| <i>Metarhizium anisopliae</i> ARSEF549             | GCA_002456175.2            |
| <i>Metarhizium rileyi</i> Cep018-CH2               | GCA_007866325.1            |
| <i>Beauveria pseudobassiana</i> KACC47484          | GCA_003267905.1            |
| <i>Beauveria pseudobassiana</i> RGM2184            | GCA_022985055.1            |
| <i>Metarhizium brunneum</i> ARSEF3297              | GCA_000814965.1            |
| <i>Metarhizium anisopliae</i> BRIP53293            | GCA_000426965.1            |
| <i>Metarhizium album</i> ARSEF1941                 | GCA_000804445.1            |
| <i>Cordyceps javanica</i> IJ2G                     | GCA_006981975.1            |
| <i>Ophiocordyceps polyrhachis-furcata</i> BCC54312 | GCA_001633055.2            |
| <i>Akanthomyces lecanii</i> RCEF1005               | GCA_001636795.1            |
| <i>Cordyceps militaris</i> CM01                    | GCA_000225605.1            |
