# Supplementary material for: Identification of Exoenzymes Secreted by Entomopathogenic Fungus Beauveria pseudobassiana RGM 2184 and Their Effect on the Degradation of Cocoons and Pupae of Quarantine Pest Lobesia botrana
Source: MDPI journal article supplement (doi:10.3390/jof8101083), 2022-10-14
Supplement: s1 [file s1]

**Table S2.** List of enzymes used for aminoacid composition analysis.

|                                                 | Activity                                   | Kingdom                     | Organism                                            | Accession number                     | Reference                                    |                             |      |
|-------------------------------------------------|--------------------------------------------|-----------------------------|-----------------------------------------------------|--------------------------------------|----------------------------------------------|-----------------------------|------|
| Cold-adapted                                    | Serine protease                            | Fungi                       | <i>Glaciozyma antarctica</i> PI12                   | AYC49704.1 <sup>G</sup>              | [48]                                         |                             |      |
|                                                 |                                            |                             | <i>Linnemannia hyalina</i> SCG-10                   | KAG9065897.1 <sup>G</sup>            | [49]                                         |                             |      |
|                                                 |                                            |                             | <i>Glaciozyma antarctica</i> PI12                   | CAQ76821.1 <sup>G</sup>              | [50]                                         |                             |      |
|                                                 |                                            | Bacteria                    | <i>Vibrio</i> sp. PA-44                             | AAO16017.1 <sup>G</sup>              | [51]                                         |                             |      |
|                                                 |                                            |                             | <i>Shewanella piezotolerans</i> WP3 / JCM 13877     | WP_020914201 <sup>R</sup>            | [52]                                         |                             |      |
|                                                 |                                            |                             | <i>Colwellia psychrerythraea</i> 34H / ATCC BAA-681 | WP_011043668.1 <sup>R</sup>          | [53]                                         |                             |      |
|                                                 | Lipase                                     | Fungi                       | <i>Onygenales</i> sp. P7                            | ADY17230.1 <sup>G</sup>              | [54]                                         |                             |      |
|                                                 |                                            |                             | <i>Emericella nidulans</i> NFCCI 3643               | EAA64964.1 <sup>G</sup>              | [55]                                         |                             |      |
|                                                 |                                            |                             | <i>Pseudomonas fluorescens</i> B68                  | AAU10321.1 <sup>G</sup>              | [56]                                         |                             |      |
|                                                 |                                            | Bacteria                    | <i>Bacillus pumilus</i> 1_16A                       | WP_065098612.1 <sup>R</sup>          | [57]                                         |                             |      |
|                                                 |                                            |                             | Chitinase                                           | Fungi                                | <i>Glaciozyma antarctica</i> PI12            | AEH16745.1 <sup>G</sup>     | [58] |
|                                                 |                                            |                             |                                                     |                                      | <i>Linnemannia hyalina</i> SCG-10            | KAG9072959.1 <sup>G</sup>   | [59] |
| Bacteria                                        | <i>Vibrio</i> sp. Fi:7                     | AAG12973.1 <sup>G</sup>     |                                                     | [60]                                 |                                              |                             |      |
|                                                 | <i>Pseudoalteromonas</i> sp. DL-6          | QBJ64793.1 <sup>G</sup>     |                                                     | [61]                                 |                                              |                             |      |
| Mesophilic                                      | Serine protease                            | Fungi                       | <i>Parengyodontium album</i>                        | 1IC6 <sup>P</sup>                    | [62]                                         |                             |      |
|                                                 |                                            |                             | <i>Metarhizium acridum</i> CQMa 102                 | XP_007814452.1 <sup>R</sup>          | [63]                                         |                             |      |
|                                                 |                                            |                             | <i>Metarhizium robertsii</i> ARSEF 23               | XP_011411569.1 <sup>R</sup>          | [63]                                         |                             |      |
|                                                 |                                            | Bacteria                    | <i>Staphylococcus epidermidis</i> Tu 3298           | CAA44257.1 <sup>G</sup>              | [64]                                         |                             |      |
|                                                 |                                            |                             | <i>Enterococcus faecalis</i> MMH594                 | AAK67268.1 <sup>G</sup>              | [65]                                         |                             |      |
|                                                 |                                            |                             | <i>Clostridium</i> sp. BNL1100                      | AEY65929.1 <sup>G</sup>              | [66]                                         |                             |      |
|                                                 | Lipase                                     | Fungi                       | <i>Tuber melanosporum</i> Mel28                     | 5MII <sup>P</sup>                    | [67]                                         |                             |      |
|                                                 |                                            |                             | <i>Rhizopus delemar</i> RA 99-880                   | EIE86673.1 <sup>G</sup>              | [68]                                         |                             |      |
|                                                 |                                            | Bacteria                    | <i>Bacillus subtilis</i> 168                        | NP_388152.1 <sup>R</sup>             | [69]                                         |                             |      |
|                                                 |                                            |                             | <i>Proteus mirabilis</i> PM185                      | OZS69007.1 <sup>G</sup>              | [70]                                         |                             |      |
|                                                 |                                            |                             | <i>Bacillus pumilus</i> F3                          | ABK80759.1 <sup>G</sup>              | [71]                                         |                             |      |
|                                                 |                                            | Chitinase                   | Fungi                                               | <i>Trichoderma reesei</i> PC-3-7     | OTA05027.1 <sup>G</sup>                      | [72]                        |      |
|                                                 | <i>Trichoderma reesei</i> PC-3-8           |                             |                                                     | BAD44715.1 <sup>G</sup>              | [72]                                         |                             |      |
|                                                 | <i>Aspergillus niger</i> An76              |                             |                                                     | GAQ37864.1 <sup>G</sup>              | [73]                                         |                             |      |
|                                                 | <i>Trichoderma viride</i> LTR-2            |                             |                                                     | ABR27743.1 <sup>G</sup>              | [74]                                         |                             |      |
|                                                 | Bacteria                                   |                             | <i>Bacillus circulans</i> WL-12                     | 1ITX <sup>P</sup>                    | [75]                                         |                             |      |
|                                                 |                                            |                             | <i>Paenibacillus pasadenensis</i> CS0611            | ASO66300.1 <sup>G</sup>              | [76]                                         |                             |      |
|                                                 | Thermophilic                               | Serine protease             | Fungi                                               | <i>Thermus thermophilus</i> JCM10941 | BDA37360.1 <sup>G</sup>                      | [77]                        |      |
| <i>Thermoascus aurantiacus</i> var. Levisporus  |                                            |                             |                                                     | ABY71274.1 <sup>G</sup>              | [78]                                         |                             |      |
| Bacteria                                        |                                            |                             | <i>Pyrolobus fumarii</i> 1A                         | AEM38280.1 <sup>G</sup>              | [79]                                         |                             |      |
|                                                 |                                            |                             | <i>Thermococcus kodakaraensis</i>                   | WP_011250640.1 <sup>R</sup>          | [80]                                         |                             |      |
| Lipase                                          |                                            | Fungi                       | <i>Thermomyces lanuginosus</i> T03                  | ABV69591.1 <sup>G</sup>              | [81]                                         |                             |      |
|                                                 |                                            |                             | <i>Thermothelomyces thermophilus</i> ATCC 42464     | XP_003664847.1 <sup>R</sup>          | [82]                                         |                             |      |
|                                                 |                                            |                             | <i>Thermothelomyces thermophilus</i> ATCC 42464     | XP_003659962.1 <sup>R</sup>          | [82]                                         |                             |      |
|                                                 |                                            | Bacteria                    | <i>Geobacillus</i> sp.                              | WP_014195917.1 <sup>R</sup>          | [83]                                         |                             |      |
|                                                 |                                            |                             | <i>Geobacillus</i> sp.                              | WP_033008930.1 <sup>R</sup>          | [83]                                         |                             |      |
|                                                 |                                            |                             | Chitinase                                           | Fungi                                | <i>Thermochaetoides thermophila</i> DSM 1495 | XP_006692378.1 <sup>R</sup> | [84] |
| <i>Thermoascus aurantiacus</i> var. Aurantiacus |                                            | ADT82646.1 <sup>G</sup>     |                                                     |                                      | [85]                                         |                             |      |
| <i>Thermochaetoides thermophila</i> DSM 1495    |                                            | XP_006692378.1 <sup>R</sup> |                                                     |                                      | [84]                                         |                             |      |
| <i>Thermoascus aurantiacus</i> var. Levisporus  | ABS00927.1 <sup>G</sup>                    | [85]                        |                                                     |                                      |                                              |                             |      |
| Bacteria                                        | <i>Acetivibrio thermocellus</i> ATCC 27405 | CAA93150.1 <sup>G</sup>     | [86]                                                |                                      |                                              |                             |      |

<sup>G</sup> Genbank accession number; <sup>R</sup> NCBI Reference Sequence accession number; <sup>P</sup> Protein Data Bank structure ID.
